# Supplementary material for: Implementation of artificial intelligence for the detection of cutaneous melanoma within a primary care setting: prevalence and types of skin cancer in outdoor enthusiasts
Source: PeerJ. 2023 Aug 8;11:e15737. doi: 10.7717/peerj.15737 (PMC10416769; doi:10.7717/peerj.15737)
Supplement: Supplemental Information 1 [file peerj-11-15737-s001.xlsx]

## Sheet: Raw data skin
Height	Weight	Smoking status	Primary_Activity_Experience	Surfing ability	Surfing status	Surfboad type	Surfing stance	activity mins per session	Hat	Rashie/tshirt	Reg skin self checks	suspicious lesions	How long was last check	Who performed last check	Do you place sig. on who checks your skin?	Fitz. Skin type	Family Hx of skin cancer	Blistering sunburns as a child	Number of sunburns in last 12 months?	Any skin lesions of concern?	Do you have a hx of skin cancer?	Hx actinic keratosis	Hx BCC	Hx SCC	Hx IEC	Hx Mel	Hx skin cancer AND this study	AK, KC or MM diagnosed?	Top of the head	Face	Lip	Nose	Ear	Neck	Abdomen	Shoulder	Chest	Arm	Back	Hand	Upper leg/thigh	Lower leg	Foot	Skin cancer AND OR this study	AK	BCC	SCC	IEC	MM
193	70	2	17					15	0	0	0	0	3	2	0	2	0	0	6	0	0	0	0	0	0	0	0	0	0	0	0	0	0	0	0	0	0	0	0	0	0	0	0	0	2	2	2	2	2
160	52	2	0					60	0	1	0	0	4	1	1	2	0	0	2	0	0	0	0	0	0	0	0	0	0	0	0	0	0	0	0	0	0	0	0	0	0	0	0	0	2	2	2	2	2
165	61	2	3					60	0	0	0	0	3	1	1	2	1	1	2	0	0	0	0	0	0	0	0	0	0	0	0	0	0	0	0	0	0	0	0	0	0	0	0	0	2	2	2	2	2
158	65	2	8	2	1	1	1	120	0	1	1	1	4	1	1	2	1	1	2	1	0	0	0	0	0	0	0	0	0	0	0	0	0	0	0	0	0	0	0	0	0	0	0	0	2	2	2	2	2
185	74	2	4					30	0	1	0	0	1		0	2	0	1	5	1	0	0	0	0	0	0	0	0	0	0	0	0	0	0	0	0	0	0	0	0	0	0	0	0	2	2	2	2	2
167	57	2	5					60	1	1	1	0	2	1	1	2	1	1	5	0	0	0	0	0	0	0	0	0	0	0	0	0	0	0	0	0	0	0	0	0	0	0	0	0	2	2	2	2	2
170	85	2	5	2	1	1	1	90	1	1	1	1	6	1	1	2	0	1	6	0	0	0	0	0	0	0	0	0	0	0	0	0	0	0	0	0	0	0	0	0	0	0	0	0	2	2	2	2	2
184	88	2	8					120	1	0	0	0	3	2	0	2	0	0	0	0	0	0	0	0	0	0	0	0	0	0	0	0	0	0	0	0	0	0	0	0	0	0	0	0	2	2	2	2	2
170	73	2	16	3	1	1	1	180	0	1	0	0	3	3	1	3	1	0	10	0	0	0	0	0	0	0	0	1	0	0	0	0	0	0	0	0	0	0	1	0	0	0	0	0	2	2	2	2	2
186	103	2	6					60	1	1	1	1	0		0	2	1	1	12	1	0	0	0	0	0	0	0	1	1	0	0	0	0	0	0	0	0	0	0	0	0	0	0	2	2	2	2	2	2
170	53	2	6					120	1	1	1	0	1		1	2	1	1	0	1	0	0	0	0	0	0	0	0	0	0	0	0	0	0	0	0	0	0	0	0	0	0	0	0	2	2	2	2	2
169	62	2	7					30	1	0	0	0	3	1	1	2	0	0	2	0	0	0	0	0	0	0	0	0	0	0	0	0	0	0	0	0	0	0	0	0	0	0	0	0	2	2	2	2	2
157	51	2	7					60	1	1	0	0	3	1	0	2	0	1	1	1	0	0	0	0	0	0	0	0	0	0	0	0	0	0	0	0	0	0	0	0	0	0	0	0	2	2	2	2	2
174	69	2	7					30	0	1	1	1	3	2	0	2	1	1	1	0	0	0	0	0	0	0	0	1	0	0	0	0	0	0	0	0	0	0	1	0	0	0	0	2	2	2	2	2	2
195	80	2	10					60	0	1	0	0	8	4	1	2	1	1	2	0	0	0	0	0	0	0	0	0	0	0	0	0	0	0	0	0	0	0	0	0	0	0	0	0	2	2	2	2	2
180	71	2	16	3	1	1	2	120	0	1	0	0	7	1	1	2	1	1	12	0	0	0	0	0	0	0	0	0	0	0	0	0	0	0	0	0	0	0	0	0	0	0	0	0	2	2	2	2	2
175	68	2	8					50	1	0	1	0	3	1	1	2	1	0	0	0	0	0	0	0	0	0	0	0	0	0	0	0	0	0	0	0	0	0	0	0	0	0	0	0	2	2	2	2	2
172	64	2	20	2	1	1	1	60	1	1	0	0	0		1	2	1	0	0	0	0	0	0	0	0	0	0	0	0	0	0	0	0	0	0	0	0	0	0	0	0	0	0	0	2	2	2	2	2
181	68	2	12	3	1	3	1	60	0	0	0	0	5	2	1	2	0	1	7	0	0	0	0	0	0	0	0	0	0	0	0	0	0	0	0	0	0	0	0	0	0	0	0	0	2	2	2	2	2
169	57	2	6	2	1	3	1	90	0	0	0	0	5	1	1	3	1	1	7	0	0	0	0	0	0	0	0	0	0	0	0	0	0	0	0	0	0	0	0	0	0	0	0	0	2	2	2	2	2
171	84	2	22					120	1	0	1	0	2	1	1	3	1	1	1	0	1	0	1	1	0	1	0	0	0	0	0	0	0	0	0	0	0	0	0	0	0	0	0	1	2	2	2	2	2
180	85	2	20					60	0	0	0	0	5	2	1	2	1	1	4	0	0	0	0	0	0	0	0	0	0	0	0	0	0	0	0	0	0	0	0	0	0	0	0	0	2	2	2	2	2
188	93	2	10					60	0	1	1	0	3	1	0	2	1	0	3	1	0	0	0	0	0	0	0	0	0	0	0	0	0	0	0	0	0	0	0	0	0	0	0	0	2	2	2	2	2
170	80	3	10					60	0	1	0	0	1		1	2	0	0	0	0	0	0	0	0	0	0	0	0	0	0	0	0	0	0	0	0	0	0	0	0	0	0	0	0	2	2	2	2	2
183	73	2	10	3	1	1	1	60	0	0	0	0	5	1	1	3	0	0	3	0	0	0	0	0	0	0	0	0	0	0	0	0	0	0	0	0	0	0	0	0	0	0	0	0	2	2	2	2	2
190	74	2	11					0	1	1	1	0	2	1	1	2	1	0	5	0	0	0	0	0	0	0	0	0	0	0	0	0	0	0	0	0	0	0	0	0	0	0	0	0	2	2	2	2	2
186	90	2	11					30	1	1	0	1	2	1	1	2	1	1	0	0	1	0	0	0	0	1	0	0	0	0	0	0	0	0	0	0	0	0	0	0	0	0	0	1	2	2	2	2	2
156	58	2	11					90	1	1	1	0	2	3	1	2	0	0	1	0	1	0	0	0	0	1	1	1	0	0	0	0	0	0	0	0	0	0	0	0	0	1	0	3	2	2	2	2	1
171	69	2	11					60	1	1	1	1	2	1	1	2	1	1	8	0	0	0	0	0	0	0	0	0	0	0	0	0	0	0	0	0	0	0	0	0	0	0	0	0	2	2	2	2	2
178	82	2	15	2	1	1	2	60	0	0	1	0	3	1	1	2	0	1	6	0	0	0	0	0	0	0	0	1	0	0	0	0	0	0	0	0	0	0	1	0	0	0	0	2	2	2	2	2	2
183	78	2	20	3	1	1	1	90	0	1	0	0	2	1	1	2	1	1	3	0	0	0	0	0	0	0	0	0	0	0	0	0	0	0	0	0	0	0	0	0	0	0	0	0	2	2	2	2	2
170	65	2	11					60	1	0	0	1	4	2	1	2	1	1	6	0	0	0	0	0	0	0	0	0	0	0	0	0	0	0	0	0	0	0	0	0	0	0	0	0	2	2	2	2	2
156	58	2	11					90	1	1	1	0	2	3	1	2	0	0	0	0	1	0	0	0	0	1	1	1	0	0	0	0	0	0	1	0	0	0	0	0	0	0	0	3	2	2	2	2	2
162	57	2	11					60	1	1	1	0	2	1	1	2	0	1	0	0	0	0	0	0	0	0	0	1	0	0	0	0	0	0	0	0	0	0	1	0	0	0	0	2	2	2	2	2	2
187	85	2	10	2	1	1	1	60	0	1	0	0	8	1	0	2	0	1	1	0	0	0	0	0	0	0	0	1	0	0	0	0	0	0	0	0	0	0	1	0	0	0	0	2	2	2	2	2	2
190	97	3	10	2	1	1	1	60	0	0	0	1	3	1	1	2	1	1	3	1	0	0	0	0	0	0	0	0	0	0	0	0	0	0	0	0	0	0	0	0	0	0	0	0	2	2	2	2	2
166	68	2	12					60	1	1	0	1	8	1	1	2	0	1	0	0	0	0	0	0	0	0	0	0	0	0	0	0	0	0	0	0	0	0	0	0	0	0	0	0	2	2	2	2	2
168	57	2	44						1	0	0	0	5	1	1	3	1	0	3	0	0	0	0	0	0	0	0	0	0	0	0	0	0	0	0	0	0	0	0	0	0	0	0	0	2	2	2	2	2
171	70	2	12					70	1	1	1	0	3	1	0	2	0	1	5	0	0	0	0	0	0	0	0	0	0	0	0	0	0	0	0	0	0	0	0	0	0	0	0	0	2	2	2	2	2
165	56	2	12					60	0	0	1	0	2	1	1	3	0	0	0	0	1	0	0	0	0	1	0	0	0	0	0	0	0	0	0	0	0	0	0	0	0	0	0	1	2	2	2	2	2
180	80	1	20					60	0	0	0	0	3	2	0	2	1	1	3	0	0	0	0	0	0	0	0	0	0	0	0	0	0	0	0	0	0	0	0	0	0	0	0	0	2	2	2	2	2
165	62	2	12					60	1	1	1	0	3	1	1	2	0	0	0	0	0	0	0	0	0	0	0	0	0	0	0	0	0	0	0	0	0	0	0	0	0	0	0	0	2	2	2	2	2
165	65	2	12					60	1	0	0	0	6	1	0	2	0	1	0	1	0	0	0	0	0	0	0	0	0	0	0	0	0	0	0	0	0	0	0	0	0	0	0	0	2	2	2	2	2
162	60	2	12					45	1	1	1	0	3	1	1	2	1	0	0	0	1	0	0	0	0	1	0	0	0	0	0	0	0	0	0	0	0	0	0	0	0	0	0	1	2	2	2	2	2
164	53	2	12					60	1	1	1	0	2	1	1	2	0	0	0	1	0	0	0	0	0	0	0	0	0	0	0	0	0	0	0	0	0	0	0	0	0	0	0	0	2	2	2	2	2
173	68	2	12					50	1	1	0	0	3	1	1	2	1	0	1	1	0	0	0	0	0	0	0	0	0	0	0	0	0	0	0	0	0	0	0	0	0	0	0	0	2	2	2	2	2
151	49.5	2	31					60	0	0	0	0	2	1	1	2	1	1	0	1	1	0	1	0	0	0	1	1	0	1	0	0	0	0	0	0	0	0	0	0	0	0	0	1	2	1	2	2	2
172	70	2	13					90	1	0	1	0	4	2	0	2	1	1	0	0	0	0	0	0	0	0	0	0	0	0	0	0	0	0	0	0	0	0	0	0	0	0	0	0	2	2	2	2	2
173	59	2	13					55	1	1	0	0	2	2	1	2	1	1	2	0	0	0	0	0	0	0	0	0	0	0	0	0	0	0	0	0	0	0	0	0	0	0	0	0	2	2	2	2	2
168	48	2	3	2	1	3	1	50	0	0	1	1	2	2	1	2	1	0	5	1	0	0	0	0	0	0	0	0	0	0	0	0	0	0	0	0	0	0	0	0	0	0	0	0	2	2	2	2	2
183	82	2	13					30	1	0	1	0	4	1	1	2	1	1	2	0	0	0	0	0	0	0	0	1	0	0	0	0	0	1	0	0	0	0	1	0	0	0	0	2	2	1	2	2	2
183	114	2	20	3	1	1	1	120	0	1	1	0	4	1	1	2	1	1	1	1	0	0	0	0	0	0	0	1	0	1	0	0	0	0	0	0	0	0	0	0	0	0	0	2	2	1	2	2	2
183	77	2	13					45	1	0	1	0	3	1	0	2	0	1	0	1	0	0	0	0	0	0	0	0	0	0	0	0	0	0	0	0	0	0	0	0	0	0	0	0	2	2	2	2	2
161	58	2	13					90	1	1	0	1	0		1	2	1	0	4	1	0	0	0	0	0	0	0	1	0	0	0	1	0	0	0	0	0	0	0	0	0	0	0	2	2	1	2	2	2
170	60	2	13					45	1	1	0	1	3	2	1	2	1	1	0	1	0	0	0	0	0	0	0	0	0	0	0	0	0	0	0	0	0	0	0	0	0	0	0	0	2	2	2	2	2
163	56	2	32					10	0	1	1	1	2	1	1	2	1	1	0	1	1	0	0	0	0	1	0	0	0	0	0	0	0	0	0	0	0	0	0	0	0	0	0	1	2	2	2	2	2
173	75	2	14					360	1	0	0	0	4	1	1	2	0	0	10	0	0	0	0	0	0	0	0	1	1	0	0	1	0	0	0	0	0	0	0	0	0	0	0	2	1	2	2	2	2
168	61	2	14					60	1	1	1	1	2	1	1	2	1	1	3	1	1	0	0	0	0	1	1	1	0	0	0	0	0	0	0	0	1	0	0	0	0	0	0	3	2	2	2	2	2
179	80	3	20	2	1	1	1	90	0	1	0	0	1		1	2	1	1	1	0	0	0	0	0	0	0	0	0	0	0	0	0	0	0	0	0	0	0	0	0	0	0	0	0	2	2	2	2	2
156	61	2	14					60	0	0	1	0	2	1	1	2	1	0	2	0	0	0	0	0	0	0	0	0	0	0	0	0	0	0	0	0	0	0	0	0	0	0	0	0	2	2	2	2	2
180	70	2	10	2	1	3	1	90	0	1	1	0	7	2	0	2	0	1	2	0	0	0	0	0	0	0	0	0	0	0	0	0	0	0	0	0	0	0	0	0	0	0	0	0	2	2	2	2	2
166	63	2	28					60	0	0	1	0	4	2	1	2	1	0	0	0	0	0	0	0	0	0	0	0	0	0	0	0	0	0	0	0	0	0	0	0	0	0	0	0	2	2	2	2	2
157	50	2	33					15	0	1	1	1	2	1	1	2	1	1	1	0	0	0	0	0	0	0	0	1	0	0	0	0	0	0	0	0	0	0	1	0	0	1	0	2	2	2	2	2	2
190	96	2	5	2	1	3	1	45	0	1	1	1	3	1	1	3	0	0	3	0	0	0	0	0	0	0	0	0	0	0	0	0	0	0	0	0	0	0	0	0	0	0	0	0	2	2	2	2	2
164	54	2	15					120	1	0	1	0	5	2	1	2	1	0	12	1	0	0	0	0	0	0	0	0	0	0	0	0	0	0	0	0	0	0	0	0	0	0	0	0	2	2	2	2	2
163	50	2	15					60	0	0	0	0	3	1	1	2	1	0	1	0	0	0	0	0	0	0	0	0	0	0	0	0	0	0	0	0	0	0	0	0	0	0	0	0	2	2	2	2	2
175	80	2	15					60	1	1	0	0	7	2	1	2	1	1	2	0	1	0	1	0	0	0	0	0	0	0	0	0	0	0	0	0	0	0	0	0	0	0	0	1	2	2	2	2	2
167	63	2	5	2	1	1	2	90	1	1	0	1	4	2	1	2	0	0	2	1	0	0	0	0	0	0	0	0	0	0	0	0	0	0	0	0	0	0	0	0	0	0	0	0	2	2	2	2	2
182	86	2	15					60	0	1	1	1	0		1	2	0	1	3	1	0	0	0	0	0	0	0	0	0	0	0	0	0	0	0	0	0	0	0	0	0	0	0	0	2	2	2	2	2
180	85	2	15					60	0	1	1	0	3	3	1	2	1	1	3	1	0	0	0	0	0	0	0	1	0	1	0	0	0	0	0	0	0	0	0	1	0	0	0	2	1	2	2	2	2
185	80	2	15					45	1	1	0	0	3	1	0	2	0	1	6	0	0	0	0	0	0	0	0	0	0	0	0	0	0	0	0	0	0	0	0	0	0	0	0	0	2	2	2	2	2
170	65	2	20	2	1	1	1	60	0	0	1	0	2	1	1	3	1	0	2	0	0	0	0	0	0	0	0	0	0	0	0	0	0	0	0	0	0	0	0	0	0	0	0	0	2	2	2	2	2
178	63	2	16					30	1	0	1	0	2	1	1	2	0	0	1	0	0	0	0	0	0	0	0	0	0	0	0	0	0	0	0	0	0	0	0	0	0	0	0	0	2	2	2	2	2
183	97	2	16					40	1	1	1	0	2	2	1	2	0	1	0	0	0	0	0	0	0	0	0	1	0	0	0	0	0	0	0	0	0	0	1	0	0	0	0	2	2	2	2	2	1
165	63	2	4	3	1	1	1	90	0	1	0	1	4	1	1	2	1	1	2	1	0	0	0	0	0	0	0	0	0	0	0	0	0	0	0	0	0	0	0	0	0	0	0	0	2	2	2	2	2
194	98	3	10	2	1	1	1	60	1	0	0	1	2	1	0	2	1	1	9	0	1	0	0	0	0	1	0	0	0	0	0	0	0	0	0	0	0	0	0	0	0	0	0	1	2	2	2	2	2
192	105	2	25	3	1	1	2	120	0	1	0	0	1		1	2	0	1	0	1	0	0	0	0	0	0	0	0	0	0	0	0	0	0	0	0	0	0	0	0	0	0	0	0	2	2	2	2	2
167	74	2	16					60	1	1	0	1	1		1	2	1	1	0	1	0	0	0	0	0	0	0	0	0	0	0	0	0	0	0	0	0	0	0	0	0	0	0	0	2	2	2	2	2
175	66	2	25	3	1	1	2	90	1	1	0	0	3	1	1	3	0	0	0	1	0	0	0	0	0	0	0	0	0	0	0	0	0	0	0	0	0	0	0	0	0	0	0	0	2	2	2	2	2
185	95	2	15	2	1	1	2	60	0	1	1	0	3	1	1	2	0	1	1	0	0	0	0	0	0	0	0	0	0	0	0	0	0	0	0	0	0	0	0	0	0	0	0	0	2	2	2	2	2
190	110	3	17					0	1	1	0	0	8	1	0	2	0	0	4	0	0	0	0	0	0	0	0	1	0	0	0	0	0	0	0	0	0	0	0	1	0	0	0	2	1	2	2	2	2
172	65	2	17					60	1	1	1	0	4	1	1	2	1	0	1	1	0	0	0	0	0	0	0	0	0	0	0	0	0	0	0	0	0	0	0	0	0	0	0	0	2	2	2	2	2
178	78	2	17					20	0	0	0	0	3	1	1	2	0	1	0	1	1	0	1	0	0	0	1	1	0	0	0	1	0	0	0	0	0	0	0	1	0	0	0	3	1	2	2	1	2
161	71	2	25	3	1	1	2	60	0	0	0	1	1		0	2	1	0	0	1	0	0	0	0	0	0	0	1	0	0	0	0	0	0	0	0	0	0	0	0	0	1	0	2	1	2	2	1	2
173	76	2	30					30	0	1	1	0	3	1	1	2	0	0	2	1	0	0	0	0	0	0	0	0	0	0	0	0	0	0	0	0	0	0	0	0	0	0	0	0	2	2	2	2	2
184	80	2	32					30	0	1	0	0	3	1	1	2	1	1	12	0	0	0	0	0	0	0	0	0	0	0	0	0	0	0	0	0	0	0	0	0	0	0	0	0	2	2	2	2	2
182	95	2	25	2	1	1	1	90	0	1	1	0	4	1	1	2	0	1	2	0	0	0	0	0	0	0	0	1	1	0	0	0	0	0	0	0	0	0	0	0	0	0	0	2	1	2	2	2	2
170	67	2	17					60	0	1	1	0	8	1	1	2	1	0	1	0	0	0	0	0	0	0	0	0	0	0	0	0	0	0	0	0	0	0	0	0	0	0	0	0	2	2	2	2	2
197	97	2	17					120	1	1	1	0	1		1	2	0	1	5	1	0	0	0	0	0	0	0	1	0	0	0	0	0	0	0	0	0	0	1	0	0	0	0	2	1	2	2	2	2
175	76	2	18					60	1	1	1	1	2	3	1	2	1	1	1	0	1	0	0	0	0	1	1	1	0	0	0	0	0	0	1	0	0	1	0	0	0	0	0	3	2	2	2	2	2
165	49	2	18					30	1	1	1	0	2	1	1	2	0	0	0	1	0	0	0	0	0	0	0	0	0	0	0	0	0	0	0	0	0	0	0	0	0	0	0	0	2	2	2	2	2
181	63	2	18					60	1	1	1	0	2	1	1	3	1	0	0	0	0	0	0	0	0	0	0	0	0	0	0	0	0	0	0	0	0	0	0	0	0	0	0	0	2	2	2	2	2
175	67	2	18					90	1	1	1	1	3	1	1	2	1	1	1	0	0	0	0	0	0	0	0	0	0	0	0	0	0	0	0	0	0	0	0	0	0	0	0	0	2	2	2	2	2
176	70	2	31	3	2	1	1	60	0	1	0	0	3	1	1	2	1	0	3	0	0	0	0	0	0	0	0	0	0	0	0	0	0	0	0	0	0	0	0	0	0	0	0	0	2	2	2	2	2
172	75	2	18					45	1	1	1	0	3	1	1	2	1	0	1	0	0	0	0	0	0	0	0	0	0	0	0	0	0	0	0	0	0	0	0	0	0	0	0	0	2	2	2	2	2
155	50	2	18					30	1	1	1	1	2	1	0	2	1	1	1	1	0	0	0	0	0	0	0	1	0	0	0	0	0	0	0	0	1	0	0	0	0	0	0	2	1	2	2	2	2
172	74	2	27	3	2	1	2	80	0	1	1	0	2	1	0	2	1	1	2	0	0	0	0	0	0	0	0	1	0	0	0	0	0	0	0	0	0	0	1	0	0	0	0	2	2	1	2	2	2
170	84	3	30	3	2	1	2	30	0	0	1	0	2	1	1	3	1	1	6	0	1	0	1	0	1	0	1	1	0	0	0	0	0	1	0	0	0	0	0	0	0	0	0	3	1	2	2	2	2
175	80	2	30	3	1	1	1	60	0	0	1	1	4	3	0	3	1	0	1	1	0	0	0	0	0	0	0	0	0	0	0	0	0	0	0	0	0	0	0	0	0	0	0	0	2	2	2	2	2
180	80	2	20	3	1	1	1	60	0	1	0	0	3	1	1	2	1	1	2	0	0	0	0	0	0	0	0	0	0	0	0	0	0	0	0	0	0	0	0	0	0	0	0	0	2	2	2	2	2
169	60	2	25	2	1	1	2	90	0	1	0	0	3	1	1	2	1	1	4	0	0	0	0	0	0	0	0	1	0	1	0	0	0	0	0	0	0	0	0	0	0	0	0	2	1	2	2	2	2
192	101	2	19					120	1	1	0	0	1		0	2	0	1	0	0	0	0	0	0	0	0	0	0	0	0	0	0	0	0	0	0	0	0	0	0	0	0	0	0	2	2	2	2	2
165	50	2	19					45	1	1	1	0	2	1	1	2	0	1	0	0	0	0	0	0	0	0	0	0	0	0	0	0	0	0	0	0	0	0	0	0	0	0	0	0	2	2	2	2	2
163	76	2	5	2	1	1	1	60	0	1	1	1	1	3	1	2	1	0	5	1	1	0	1	0	0	1	1	1	0	0	0	0	0	0	0	0	1	0	1	1	0	0	0	3	2	2	2	2	2
167	67	3	23	2	1	3	2	120	0	1	1	0	3	1	1	2	0	0	2	0	0	0	0	0	0	0	0	0	0	0	0	0	0	0	0	0	0	0	0	0	0	0	0	0	2	2	2	2	2
173	68	2	20					240	0	1	0	0	5	1	1	2	0	1	3	0	1	0	1	0	0	0	0	0	0	0	0	0	0	0	0	0	0	0	0	0	0	0	0	1	2	2	2	2	2
170	70	2	20					60	1	0	1	1	2	1	1	2	1	1	1	1	1	1	1	0	0	0	1	1	0	0	0	0	0	0	0	0	0	0	0	0	0	1	0	3	2	2	2	2	2
168	60	2	20	2	1	1	2	180	0	1	0	0	2	2	1	2	1	1	0	0	1	0	1	1	0	0	1	1	0	0	0	0	0	0	0	0	0	0	0	0	1	0	0	3	2	2	2	2	2
178	78	2	20					60	0	0	1	1	4	1	1	2	1	1	6	0	0	0	0	0	0	0	0	0	0	0	0	0	0	0	0	0	0	0	0	0	0	0	0	0	2	2	2	2	2
171	72	2	20					45	1	1	1	0	4	3	1	2	1	1	4	1	1	0	1	0	0	0	1	1	1	0	0	0	0	0	0	0	0	0	0	0	0	0	0	3	2	1	2	2	2
172	65	2	20					30	0	0	0	1	2	1	1	2	1	1	3	1	1	0	1	0	0	0	1	1	1	0	0	0	0	0	0	0	0	0	1	0	0	0	0	3	1	2	2	2	1
180	79	3	30	3	2	1	1	120	0	1	0	1	2	1	1	2	0	1	3	1	1	0	0	0	0	0	0	1	0	0	0	0	0	0	0	1	0	0	1	0	0	0	0	2	2	2	2	2	1
180	78	2	5					60	0	1	0	1	3	1	1	3	0	0	3	0	0	0	0	0	0	0	0	0	0	0	0	0	0	0	0	0	0	0	0	0	0	0	0	0	2	2	2	2	2
180	79	3	30	3	2	1	1	120	0	1	0	1	2	1	1	2	0	1	3	1	1	0	0	0	0	0	0	1	0	0	0	0	0	0	0	0	0	0	1	0	0	0	0	3	2	2	2	2	2
186	95	3	3	2	1	3	1	120	1	1	0	0	3	1	1	2	1	1	4	1	0	0	0	0	0	0	0	0	0	0	0	0	0	0	0	0	0	0	0	0	0	0	0	0	2	2	2	2	2
178	70	2	21					60	1	1	1	0	3	1	1	2	0	1	10	0	0	0	0	0	0	0	0	0	0	0	0	0	0	0	0	0	0	0	0	0	0	0	0	0	2	2	2	2	2
175	89	2	15	2	1	2	1	60	0	1	1	0	2	1	1	2	0	1	0	0	1	1	0	0	0	1	1	1	0	0	0	0	0	0	0	0	0	0	0	1	0	0	0	3	1	2	2	2	2
180	96	2	25	2	1	1	2	30	0	0	0	0	2	1	1	2	0	1	0	0	0	0	0	0	0	0	0	1	0	1	0	0	0	0	0	0	0	0	0	0	0	0	0	2	2	1	2	2	2
175	76	2	21					0	1	1	1	0	2	2	1	2	1	1	6	1	1	0	1	1	0	0	1	1	0	1	0	0	1	0	0	0	0	0	0	0	0	0	0	3	2	1	2	2	2
162	56	2	2	1	1	2	1	60	1	0	0	0	2	1	1	2	0	0	0	1	0	0	0	0	0	0	0	0	0	0	0	0	0	0	0	0	0	0	0	0	0	0	0	0	2	2	2	2	2
170	70	2	15					60	0	0	1	0	2	3	1	3	1	0	0	0	0	0	0	0	0	0	0	0	0	0	0	0	0	0	0	0	0	0	0	0	0	0	0	0	2	2	2	2	2
180	85	2	30	4	3	1	1	90	0	1	0	1	2	1	1	2	0	1	5	1	1	0	0	0	0	0	0	0	0	0	0	0	1	0	0	0	0	1	0	0	0	0	0	0	1	2	2	2	2
163	67	2	22					45	1	0	0	0	3	1	1	2	0	1	2	0	0	0	0	0	0	0	0	0	0	0	0	0	0	0	0	0	0	0	0	0	0	0	0	0	2	2	2	2	2
191	97	2	22					240	1	1	1	0	4	1	1	2	0	1	3	0	0	0	0	0	0	0	0	0	0	0	0	0	0	0	0	0	0	0	0	0	0	0	0	0	2	2	2	2	2
168	60	3	22					30	0	0	0	1	1	2	1	2	1	1	2	0	0	0	0	0	0	0	0	1	0	0	0	0	0	1	0	0	0	0	0	0	0	0	0	2	2	2	2	2	2
176	90	3	22					45	1	1	0	1	1	2	1	2	0	1	2	0	0	0	0	0	0	0	0	0	0	0	0	0	0	0	0	0	0	0	0	0	0	0	0	0	2	2	2	2	2
172	80	2	22					50	1	1	1	0	2	1	1	2	1	1	3	0	0	0	0	0	0	0	0	0	0	0	0	0	0	0	0	0	0	0	0	0	0	0	0	0	2	2	2	2	2
176	85	3	35					30	0	0	0	0	3	1	0	2	1	1	2	0	0	0	0	0	0	0	0	0	0	0	0	0	0	0	0	0	0	0	0	0	0	0	0	0	2	2	2	2	2
183	80.5	2	20	3	1	1	1	60	0	1	1	1	3	1	0	2	1	0	2	0	0	0	0	0	0	0	0	1	0	0	0	0	0	0	0	0	0	0	1	0	0	0	0	2	2	1	2	2	2
156	53	3	15	2	1	2	1	90	0	0	1	0	0		0	2	0	1	0	1	0	0	0	0	0	0	0	0	0	0	0	0	0	0	0	0	0	0	0	0	0	0	0	0	2	2	2	2	2
188	72	2	1	1	1	2	1	90	1	1	0	0	5	2	1	2	0	1	5	1	0	0	0	0	0	0	0	0	0	0	0	0	0	0	0	0	0	0	0	0	0	0	0	0	2	2	2	2	2
187	75	2	23					60	1	1	1	1	3	1	1	2	1	1	0	0	1	0	1	0	0	0	1	1	0	0	0	0	0	0	0	0	0	0	1	0	0	0	0	3	2	2	2	2	1
191	79	2	25	3	2	1	2	90	0	1	0	0	4	1	1	2	0	0	4	1	0	0	0	0	0	0	0	1	0	1	0	0	0	0	0	0	0	0	0	0	0	0	0	2	1	2	2	2	2
165	88	2	38					120	0	0	1	1	7	1	1	2	1	1	0	1	1	0	1	0	0	0	1	0	0	0	0	0	0	0	0	0	1	0	0	0	0	0	0	1	1	2	2	2	2
176	81	2	24					60	1	0	0	0	8	1	1	2	1	1	1	0	0	0	0	0	0	0	0	0	0	0	0	0	0	0	0	0	0	0	0	0	0	0	0	0	2	2	2	2	2
182	79	3	24					60	1	1	1	1	3	1	1	2	1	1	10	1	1	1	0	0	1	0	1	1	0	0	1	0	0	0	0	1	0	0	0	1	0	0	0	3	1	2	2	2	2
180	85	2	24					60	1	1	1	0	3	2	0	2	0	1	3	0	0	0	0	0	0	0	0	0	0	0	0	0	0	0	0	0	0	0	0	0	0	0	0	0	2	2	2	2	2
185	83	2	35	2	1	1	1	90	1	1	0	1	2	1	1	2	0	1	0	0	0	0	0	0	0	0	0	0	0	0	0	0	0	0	0	0	0	0	0	0	0	0	0	0	2	2	2	2	2
176	78	2	30					45	0	0	0	0	2	1	1	2	1	1	0	0	1	0	1	1	0	0	0	0	0	0	0	0	0	0	0	0	0	0	0	0	0	0	0	1	2	2	2	2	2
178	74	2	20	3	1	1	1	90	1	1	1	1	3	1	1	2	1	1	5	1	1	0	1	1	0	0	1	1	0	0	0	0	0	0	0	0	0	0	0	1	0	0	0	3	1	2	2	2	2
183	102	2	25	2	1	3	1	60	0	1	1	1	3	2	1	2	1	1	0	1	1	0	1	1	0	0	1	1	0	0	0	0	0	0	0	0	0	0	0	1	0	0	0	3	1	2	2	2	2
161	72	2	25					60	1	1	0	1	4	1	1	2	1	0	1	1	0	0	0	0	0	0	0	1	1	0	0	0	0	0	0	0	0	0	0	0	0	0	0	2	1	2	2	2	2
149	62	2	25					30	0	1	1	0	3	1	1	2	0	1	0	0	0	0	0	0	0	0	0	0	0	0	0	0	0	0	0	0	0	0	0	0	0	0	0	0	2	2	2	2	2
188	87	2	25					70	1	1	1	1	2	1	1	2	0	1	2	0	0	0	0	0	0	0	0	0	0	0	0	0	0	0	0	0	0	0	0	0	0	0	0	0	2	2	2	2	2
178	79	3	10	2	1	2	1	60	1	0	1	0	2	1	0	2	0	1	0	1	1	0	0	1	0	0	1	1	0	1	0	0	0	0	0	0	0	0	0	0	0	0	0	3	1	2	2	2	2
163	65	2	25					60	1	1	0	0	4	1	1	2	0	1	0	0	0	0	0	0	0	0	0	1	0	0	0	0	0	0	0	0	0	1	0	1	0	0	0	2	1	2	2	2	2
184	84	2	20	2	1	1	1	60	0	0	1	1	5	1	1	3	1	1	2	1	1	0	1	0	0	0	1	1	1	0	0	0	0	0	0	0	0	1	0	0	0	0	0	3	1	2	2	2	1
173	75	2	26					30	1	1	1	1	3	1	1	2	0	1	3	0	0	0	0	0	0	0	1	1	0	0	0	0	0	0	0	0	0	0	1	0	0	0	0	2	2	2	2	2	2
191	100	2	26					30	0	0	0	0	2	1	0	3	0	1	0	0	0	0	0	0	0	0	0	0	0	0	0	0	0	0	0	0	0	0	0	0	0	0	0	0	2	2	2	2	2
161	70	2	26					60	1	1	1	1	2	1	1	2	1	1	0	1	1	0	1	0	1	0	1	1	0	1	0	0	0	0	0	0	0	0	0	0	0	0	0	3	1	2	2	2	2
190	95	2	30	2	1	1	1	60	0	1	0	0	4	1	1	2	1	1	2	0	0	0	0	0	0	0	0	0	0	0	0	0	0	0	0	0	0	0	0	0	0	0	0	0	2	2	2	2	2
169	78	2	26					20	1	1	0	0	4	1	0	2	0	1	1	0	1	0	1	0	0	0	0	0	0	0	0	0	0	0	0	0	0	0	0	0	0	0	0	1	2	2	2	2	2
184	84	2	20	2	1	1	1	60	0	0	1	1	2	1	1	2	1	1	0	1	1	1	1	0	0	1	1	1	0	0	0	0	0	0	0	0	0	0	0	0	1	0	0	3	2	2	2	2	2
155	66	2	26					60	1	1	1	1	3	1	1	2	1	0	0	0	0	0	0	0	0	0	0	1	1	0	0	0	0	0	0	0	0	0	0	0	0	0	0	2	2	2	2	2	2
168	57	2	27					60	1	0	0	0	3	1	1	2	1	1	2	1	0	0	0	0	0	0	0	0	0	0	0	0	0	0	0	0	0	0	0	0	0	0	0	0	2	2	2	2	2
178	76	3	27					60	1	1	1	0	2	1	1	2	1	1	0	0	1	0	1	0	0	0	0	0	0	0	0	0	0	0	0	0	0	0	0	0	0	0	0	1	2	2	2	2	2
182	70	2	30	3	1	1	1	120	1	1	1	0	2	1	1	2	1	1	0	1	1	1	1	0	0	0	1	1	0	0	0	0	0	0	0	0	0	0	1	0	0	0	0	3	2	2	2	2	2
178	80	2	25	2	1	2	1	30	1	1	0	1	3	1	1	3	0	1	3	1	0	0	0	0	0	0	0	1	1	0	0	0	0	0	0	0	0	0	0	0	0	0	0	2	1	2	2	2	2
180	94	3	40					60	0	1	1	0	1	1	1	2	0	1	1	1	0	0	0	0	0	0	0	0	0	0	0	0	0	0	0	0	0	0	0	0	0	0	0	0	2	2	2	2	2
182	73	2	27					60	1	1	0	0	2	1	1	2	1	1	1	0	1	0	1	0	1	0	0	0	0	0	0	0	0	0	0	0	0	0	0	0	0	0	0	1	2	2	2	2	2
164	90	2	27					30	0	1	0	1	2	2	0	2	1	1	1	1	0	0	0	0	0	0	0	0	0	0	0	0	0	0	0	0	0	0	0	0	0	0	0	0	2	2	2	2	2
175	74	3	27					60	1	1	1	0	2	1	1	2	1	1	0	1	1	0	1	0	0	0	1	1	0	0	0	1	0	0	0	0	0	0	0	0	0	0	0	3	2	1	2	2	2
168	57	2	27					30	1	1	1	0	4	1	1	2	0	1	0	1	0	0	0	0	0	0	0	1	0	1	0	0	0	0	0	0	0	0	0	0	0	0	0	2	1	2	2	2	2
160	60	2	30					60	0	0	0	0	5	2	1	2	1	1	2	1	0	0	0	0	0	0	0	1	0	0	0	0	0	0	0	0	0	0	0	0	0	1	0	2	2	1	2	2	2
153	70	2	28					60	1	0	1	0	3	1	1	2	0	1	3	1	0	0	0	0	0	0	0	1	0	1	0	0	0	0	0	0	0	0	0	0	0	0	0	2	1	2	2	2	2
175	80	3	30	3	1	1	1	90	0	0	1	0	2	1	1	2	1	1	1	1	1	1	0	1	0	0	1	1	0	0	0	0	0	0	0	0	0	1	0	0	0	0	0	3	1	2	2	2	2
157	62	2	20	2	1	3	2	120	1	1	1	1	3	1	1	3	1	1	3	1	1	0	1	0	0	0	0	0	0	0	0	0	0	0	0	0	0	0	0	0	0	0	0	1	2	2	2	2	2
175	88	2	10	2	1	3	1	60	0	1	1	1	2	1	1	2	1	1	4	1	1	1	1	0	0	0	1	1	0	0	0	0	0	0	0	0	0	0	1	0	0	1	0	3	1	2	2	1	2
181	82	2	35	3	1	1	2	120	0	1	1	0	2	1	1	2	1	1	12	0	1	0	1	0	0	0	1	1	0	0	0	0	0	0	0	1	0	1	0	1	0	0	0	3	1	1	2	2	2
193	100	2	5	1	1	1	1	90	1	1	0	0	3	1	1	2	0	1	0	0	1	0	1	0	0	0	1	1	0	0	0	0	0	1	0	0	0	0	0	0	0	0	0	3	2	2	2	2	2
170	60	2	27	2	1	2	2	120	0	1	1	1	2	2	1	2	1	0	0	1	0	0	0	0	0	0	0	0	0	0	0	0	0	0	0	0	0	0	0	0	0	0	0	0	2	2	2	2	2
172	85	2	30	2	1	1	1	40	0	0	0	1	3	4	0	3	0	1	1	1	0	0	0	0	0	0	0	1	1	0	0	0	1	0	0	0	0	0	0	1	0	0	0	2	1	2	2	2	2
170	72	2	48					50	0	1	1	0	3	1	0	2	0	1	0	0	0	0	0	0	0	0	0	0	0	0	0	0	0	0	0	0	0	0	0	0	0	0	0	0	2	2	2	2	2
173	63	3	30					60	1	1	1	1	4	2	1	2	0	1	4	1	1	0	0	1	0	0	1	1	0	0	0	0	0	0	1	0	0	0	1	1	0	0	0	3	1	1	2	2	2
174	62	3	30					30	1	1	0	0	8	1	0	2	1	1	3	0	0	0	0	0	0	0	0	1	0	0	0	0	0	0	0	0	0	0	1	0	0	0	0	2	2	2	2	2	1
165	65	2	30					60	1	0	0	0	3	1	1	2	0	1	5	0	0	0	0	0	0	0	0	1	0	0	0	0	0	0	0	0	0	0	0	1	0	0	0	2	1	2	2	2	2
165	89	3	30					40	1	1	0	1	2	1	1	2	1	0	1	0	0	0	0	0	0	0	0	0	0	0	0	0	0	0	0	0	0	0	0	0	0	0	0	0	2	2	2	2	2
163	66	2	30					0	1	1	0	0	3	1	1	2	0	1	1	1	0	0	0	0	0	0	0	0	0	0	0	0	0	0	0	0	0	0	0	0	0	0	0	0	2	2	2	2	2
156	51	1	30					80	1	1	1	0	2	1	1	2	1	1	0	0	1	1	1	0	1	0	1	1	0	1	0	0	0	0	0	0	0	1	0	0	0	0	0	3	1	2	2	2	2
192	87	2	40	3	1	1	1	90	0	1	1	0	3	1	1	2	0	1	1	1	0	0	0	0	0	0	0	1	0	1	0	0	0	0	0	0	0	0	0	0	0	0	0	2	1	2	2	2	2
180	80	2	31					30	1	1	0	0	4	1	1	2	0	0	1	0	1	0	0	0	0	0	0	1	0	0	0	0	1	0	0	0	1	0	0	0	0	1	0	3	2	2	2	1	2
183	87	2	31					60	1	1	1	0	3	1	1	2	0	1	1	0	0	0	0	0	0	0	0	0	0	0	0	0	0	0	0	0	0	0	0	0	0	0	0	0	2	2	2	2	2
190	98	3	25	2	1	2	1	40	0	0	1	1	4	2	1	2	0	1	3	1	0	0	0	0	0	0	0	1	0	0	0	0	0	0	0	0	0	1	0	0	0	0	0	2	2	2	2	2	1
178	116	3	31					120	1	1	0	0	4	1	0	2	0	1	0	1	0	0	0	0	0	0	0	0	0	0	0	0	0	0	0	0	0	0	0	0	0	0	0	0	2	2	2	2	2
184	86	2	42					45	0	1	0	0	3	1	1	2	1	1	0	0	0	0	0	0	0	0	0	0	0	0	0	0	0	0	0	0	0	0	0	0	0	0	0	0	2	2	2	2	2
170	83	2	10	2	1	2	1	60	1	1	0	0	3	1	0	2	1	1	0	1	0	0	0	0	0	0	0	1	1	0	0	0	0	0	0	0	0	0	0	0	0	0	0	2	1	2	2	2	2
165	73	2	31					60	1	1	1	0	3	1	1	2	1	1	2	1	1	1	0	0	0	0	0	0	0	0	0	0	0	0	0	0	0	0	0	0	0	0	0	1	2	2	2	2	2
178	90	2	40	4	2	1	1	120	0	0	1	1	4	1	0	2	0	0	3	1	1	0	0	1	0	0	1	1	0	0	0	0	0	0	0	0	1	0	0	1	0	0	0	3	1	1	2	2	2
177	75	3	18	2	1	2	1	180	0	0	1	1	5	1	1	3	0	1	4	1	0	0	0	0	0	0	0	1	0	0	0	0	1	0	0	0	0	1	0	0	0	0	0	2	2	2	2	2	2
167	67	3	32					90	1	1	1	0	2	1	1	2	1	0	2	1	1	1	1	0	0	0	1	1	0	1	0	0	0	0	0	0	0	1	0	1	0	0	0	3	1	2	2	2	2
164	69	2	32					60	1	1	1	0	3	1	1	2	0	1	1	0	1	0	1	1	0	0	1	1	0	0	0	0	0	0	0	1	0	0	1	0	0	0	0	3	2	1	2	2	2
170	73	2	32					30	1	1	1	0	2	1	1	2	1	1	2	0	0	0	0	0	0	0	0	1	0	0	0	0	0	0	0	0	1	0	0	0	0	0	0	2	2	2	2	2	2
180	100	2	40	3	1	1	2	60	0	1	1	0	6	1	1	2	1	1	1	0	1	1	1	0	0	0	1	1	0	0	0	0	0	0	0	0	0	1	0	0	0	0	0	3	1	2	2	2	2
190	97	2	31	3	1	1	2	90	1	1	0	1	2	1	1	2	1	1	1	1	1	0	1	0	0	0	1	1	1	0	0	0	0	0	0	0	0	0	0	0	0	0	0	3	1	2	2	2	2
169	71	2	45					60	0	1	1	0	4	2	0	2	0	0	3	0	0	0	0	0	0	0	0	1	0	0	0	1	0	0	0	0	0	0	0	0	0	0	0	2	1	2	2	2	2
169	82	2	10	2	1	3	1	45	0	1	1	0	3	1	1	2	0	1	0	1	1	0	1	0	0	0	1	1	0	1	0	1	1	0	0	1	0	0	1	0	0	0	0	3	2	1	1	1	2
183	100	2	50					30	0	1	0	0	2	4	1	2	0	1	0	1	0	0	0	0	0	0	0	1	0	0	0	0	0	0	0	0	0	0	0	0	0	0	1	2	2	2	2	2	2
170	79	3	20	3	1	1	1	80	0	1	1	0	2	1	0	2	0	1	1	0	1	1	1	0	0	0	1	1	1	0	0	0	0	0	0	0	0	0	0	0	0	0	0	3	1	2	2	2	2
178	92	2	33					60	1	1	1	1	2	3	1	2	1	1	2	1	1	0	1	0	0	0	1	1	1	0	0	0	0	0	0	0	0	0	0	0	0	0	0	3	1	2	2	2	2
158	78	2	33					45	1	1	1	1	4	1	1	3	1	1	0	1	0	0	0	0	0	0	0	0	0	0	0	0	0	0	0	0	0	0	0	0	0	0	0	0	2	2	2	2	2
185	90	2	33					30	1	1	0	0	3	1	1	2	1	1	3	0	0	0	0	0	0	0	0	0	0	0	0	0	0	0	0	0	0	0	0	0	0	0	0	0	2	2	2	2	2
157.5	51	2	33					45	1	0	0	0	8	1	0	2	0	1	0	0	0	0	0	0	0	0	0	0	0	0	0	0	0	0	0	0	0	0	0	0	0	0	0	0	2	2	2	2	2
165	70	2	33					60	1	1	0	0	3	1	1	2	0	1	0	1	0	0	0	0	0	0	0	1	0	1	0	0	0	0	0	0	0	0	0	0	0	0	0	2	1	2	2	2	2
162	75	2	33					30	0	1	1	1	3	2	1	2	1	1	1	1	1	0	0	0	0	1	1	0	0	0	0	0	0	0	0	0	0	0	0	0	0	0	0	1	2	2	2	2	2
180	87	2	34					0	1	1	0	0	2	1	1	2	0	1	0	0	0	0	0	0	0	0	1	1	0	0	0	0	0	0	0	0	0	0	1	0	0	1	0	2	2	2	2	2	2
167	55	2	34					60	0	0	1	0	2	1	1	3	0	1	0	1	0	0	0	0	0	0	0	0	0	0	0	0	0	0	0	0	0	0	0	0	0	0	0	0	2	2	2	2	2
188	95	2	40	3	1	1	2	60	0	1	0	1	3	1	0	3	0	0	3	0	1	0	1	0	0	0	1	1	1	0	0	0	0	0	0	0	0	0	0	0	0	0	0	2	1	2	2	2	2
176	63	2	34					60	1	1	1	1	3	1	1	2	0	0	0	0	0	0	0	0	0	0	0	0	0	0	0	0	0	0	0	0	0	0	0	0	0	0	0	0	2	2	2	2	2
178	105	2	34					90	1	1	1	1	3	1	1	2	0	1	4	1	0	0	0	0	0	0	0	1	0	0	0	0	0	0	0	0	0	0	1	0	0	0	0	2	2	2	2	2	2
164	68	3	34					30	0	1	0	0	3	1	1	2	1	1	3	0	0	0	0	0	0	0	0	1	0	1	0	0	0	0	0	0	0	0	0	1	0	0	0	2	1	2	2	2	2
160	82	2	34					90	1	1	1	1	2	1	1	2	1	1	0	0	1	0	1	0	0	0	1	1	0	1	0	0	0	0	0	0	0	1	1	0	0	0	0	3	1	2	2	2	2
186	88	2	40	2	1	3	1	90	0	1	0	0	3	1	1	2	0	1	0	0	0	0	0	0	0	0	0	0	0	0	0	0	0	0	0	0	0	0	0	0	0	0	0	0	2	2	2	2	2
154	50	2	34					60	1	1	0	0	2	1	1	2	1	1	0	1	1	1	0	1	0	0	1	1	0	0	0	0	0	0	0	0	0	1	0	1	0	0	0	3	1	2	2	2	2
165	73	2	17					60	1	0	1	0	4	2	1	2	0	1	0	0	0	0	0	0	0	0	0	0	0	0	0	0	0	0	0	0	0	0	0	0	0	0	0	0	2	2	2	2	2
175	72	2	5	2	1	3	1	120	1	1	1	1	2	1	1	2	1	1	3	1	1	0	1	0	0	1	0	0	0	0	0	0	0	0	0	0	0	0	0	0	0	0	0	1	2	2	2	2	2
177	83	2	6					20	1	1	1	0	2	2	1	2	0	1	5	0	1	0	1	1	0	0	0	0	0	0	0	0	0	0	0	0	0	0	0	0	0	0	0	1	2	2	2	2	2
160	53	2	35					75	1	1	1	0	3	1	1	2	1	1	0	0	1	1	0	0	1	0	1	1	0	0	0	0	0	0	0	0	0	1	0	0	0	0	0	3	1	2	2	2	2
160	70	2	35					30	1	1	1	1	4	1	1	2	0	0	2	0	0	0	0	0	0	0	0	0	0	0	0	0	0	0	0	0	0	0	0	0	0	0	0	0	2	2	2	2	2
163	52	2	35					60	1	1	1	1	8	3	1	2	0	1	1	1	0	0	0	0	0	0	0	1	0	0	0	0	0	0	0	0	0	1	0	0	0	0	0	2	2	1	2	2	2
173	72	3	38	3	2	1	2	90	0	0	1	0	3	2	0	2	1	1	5	0	0	0	0	0	0	0	0	1	0	0	0	0	0	0	0	0	0	0	1	0	0	0	0	2	2	2	2	2	1
178	83	2	53	2	1	1	1	90	1	1	0	1	2	1	1	2	0	1	3	1	0	0	0	0	0	0	0	1	0	0	0	0	0	1	0	0	0	0	0	1	0	0	0	2	1	1	2	2	2
170	60	2	45					30	0	1	0	1	4	1	1	2	1	1	1	1	1	0	1	0	0	0	1	1	0	1	0	0	0	0	0	0	0	0	0	0	0	0	0	3	1	2	2	2	2
157	70	2	30					60	0	1	0	0	3	1	1	2	1	0	2	0	0	0	0	0	0	0	0	0	0	0	0	0	0	0	0	0	0	0	0	0	0	0	0	1	2	2	2	2	2
162	66	2	35					30	1	1	1	0	3	2	1	2	0	1	1	0	0	0	0	0	0	0	0	1	0	0	0	1	0	0	0	0	1	0	0	0	0	0	0	2	1	2	2	2	2
172	93	2	35					60	1	1	0	1	5	1	1	2	0	1	0	1	1	0	0	0	1	0	1	1	0	1	0	0	0	0	0	1	1	1	1	0	0	0	0	3	2	1	2	2	2
193	99	2	35					120	1	1	0	1	3	3	1	2	1	1	1	0	0	0	0	0	0	0	1	1	0	0	0	0	0	0	0	1	0	0	0	1	0	0	0	3	1	1	2	2	2
175	70	2	40	3	1	1	2	60	0	1	1	0	2	1	1	2	1	1	0	0	1	0	1	0	0	1	1	1	0	1	0	0	0	0	0	0	0	0	0	0	0	0	0	3	1	2	2	2	2
176	78	3	35					30	1	1	0	0	3	1	1	2	0	1	1	0	1	1	0	0	0	0	1	1	0	1	0	0	0	0	0	0	0	0	0	0	0	0	0	3	1	2	2	2	2
183	103	2	40	3	1	1	2	90	1	1	1	0	2	1	1	2	1	0	0	1	0	0	0	0	0	0	0	1	0	0	0	0	0	0	0	0	0	0	1	0	0	0	0	2	2	2	2	2	2
178	65	2	35					60	1	1	1	0	2	1	1	2	1	1	0	1	1	1	1	1	0	1	1	1	1	0	0	0	0	0	0	0	0	0	0	0	0	0	0	3	2	2	2	2	2
168	105	2	35					60	1	1	0	1	4	1	1	2	0	1	0	1	1	0	1	0	0	0	1	1	0	0	0	0	0	0	0	0	0	0	0	1	0	1	0	3	1	1	2	2	2
155	60	2	45					120	0	0	0	0	3	1	0	2	0	1	0	0	0	0	0	0	0	0	0	0	0	0	0	0	0	0	0	0	0	0	0	0	0	1	0	2	2	2	2	2	1
195	92	2	36					30	1	1	0	0	2	1	1	2	0	0	0	0	0	0	0	0	0	0	0	1	0	0	0	0	1	0	0	0	0	0	0	0	0	0	0	2	1	2	2	2	2
162	72	2	36					60	1	0	1	0	8	2	1	2	1	1	0	0	1	0	1	0	0	0	1	1	0	0	0	0	0	1	0	0	0	0	0	0	0	0	0	3	2	1	2	2	2
177	59	3	37					30	1	0	0	0	2	1	1	2	1	1	1	0	1	0	0	0	1	1	0	0	0	0	0	0	0	0	0	0	0	0	0	0	0	0	0	1	2	2	2	2	2
160	50	2	37					120	1	1	1	0	2	1	1	2	1	1	1	0	1	1	0	0	1	0	0	0	0	0	0	0	0	0	0	0	0	0	0	0	0	0	0	1	2	2	2	2	2
165	52	2	37					45	1	1	1	0	3	2	1	2	1	0	0	0	0	0	0	0	0	0	0	0	0	0	0	0	0	0	0	0	0	0	0	0	0	0	0	0	2	2	2	2	2
175	65	2	37					30	1	1	0	0	2	1	1	2	1	0	2	0	0	0	0	0	0	0	0	0	0	0	0	0	0	0	0	0	0	0	0	0	0	0	0	0	2	2	2	2	2
184	84	2	37					60	1	1	0	0	3	1	1	2	0	1	1	0	0	0	0	0	0	0	0	0	0	0	0	0	0	0	0	0	0	0	0	0	0	0	0	0	2	2	2	2	2
180	89	3	37					45	1	1	0	0	3	2	1	2	0	1	1	0	1	0	1	0	0	0	0	1	1	0	0	0	0	0	0	0	0	0	0	0	0	0	0	3	1	2	2	2	2
162	74	2	37					60	1	1	0	0	3	1	1	2	0	1	2	1	1	0	1	0	0	0	0	0	0	0	0	0	0	0	0	0	0	0	0	0	0	0	0	1	2	2	2	2	2
178	99	2	37					30	1	1	0	1	4	1	1	2	1	1	0	0	0	0	0	0	0	0	0	1	0	0	0	0	0	0	0	0	0	0	1	1	0	0	0	2	1	1	2	2	2
172	75	3	30	3	1	2	2	75	0	1	1	0	2	1	1	2	1	1	2	0	1	0	1	1	0	0	1	1	0	0	0	0	0	0	0	0	0	0	0	1	0	0	0	3	1	2	2	2	2
177	92	2	37					60	1	1	1	1	4	2	1	2	1	1	0	1	0	0	0	0	0	0	0	1	1	0	0	0	0	0	0	0	0	0	0	0	0	0	0	2	1	2	2	2	2
150	53	1	37					45	1	1	0	1	8	2	1	2	0	1	0	1	1	1	0	0	0	0	1	1	0	0	0	0	0	0	0	0	1	0	0	0	0	0	0	3	1	2	2	2	2
167	76	2	40					30	0	1	1	1	3	1	1	2	0	1	0	1	0	0	0	0	0	0	0	1	0	0	0	0	0	0	0	0	0	0	1	0	0	0	0	2	2	2	2	2	1
157	58	2	38					240	1	1	0	0	3	2	1	2	0	1	1	0	1	0	1	0	0	0	1	1	0	1	0	0	0	0	0	0	0	0	0	0	0	1	0	3	2	1	2	1	2
176	96	3	38					70	1	1	1	0	3	1	1	2	1	0	0	0	0	0	0	0	0	0	0	1	1	0	0	0	0	0	0	0	0	0	0	0	0	0	0	2	1	2	2	2	2
165	66	1	38					60	1	1	1	0	2	1	1	2	1	1	1	0	1	0	1	0	0	0	1	1	0	0	0	0	0	0	0	0	0	1	0	1	0	0	0	3	1	2	2	2	2
182	90	2	38					60	1	1	1	0	2	1	0	2	1	1	1	0	1	0	0	0	0	1	1	1	0	0	0	0	0	0	0	0	0	0	1	0	0	0	0	3	2	1	2	2	2
167	64	2	38					90	1	1	1	0	4	1	1	2	0	1	0	1	1	0	1	0	0	0	1	1	0	0	0	0	0	0	0	1	0	1	0	0	0	1	0	2	2	1	2	2	2
182	86	3	50					30	1	0	1	1	1	3	1	2	1	1	0	0	1	1	1	1	0	0	1	1	0	0	0	0	0	0	0	0	0	1	0	1	0	0	0	3	1	2	2	2	2
166	53	2	39					60	0	1	0	1	3	1	1	2	0	0	0	1	0	0	0	0	0	0	0	1	0	0	0	0	0	0	0	0	0	0	0	0	0	1	0	2	2	2	2	1	2
164	78	2	39					30	0	0	0	0	3	1	1	2	0	1	2	1	0	0	0	0	0	0	0	1	0	0	0	0	0	1	0	0	0	0	0	1	0	0	0	2	1	2	2	2	2
178	67	2	39					60	0	1	0	1	4	3	1	2	0	1	0	1	0	0	0	0	0	0	0	1	0	0	0	0	1	0	0	0	1	1	0	1	0	0	0	2	1	2	2	2	2
180	70	1	39					120	1	1	1	1	4	1	1	2	1	1	1	1	1	1	1	1	1	0	1	1	1	1	0	0	0	1	0	0	1	0	0	0	0	1	0	3	2	2	2	1	2
167	55	2	39					120	1	0	0	1	4	3	1	2	0	1	2	1	0	0	0	0	0	0	0	1	0	0	0	1	0	0	0	0	1	0	1	0	0	0	0	2	2	1	2	2	1
160	75	2	39					60	1	0	1	0	4	1	1	2	0	1	0	1	0	0	0	0	0	0	0	0	0	0	0	0	0	0	0	0	0	0	0	0	0	0	0	0	2	2	2	2	2
175	71	2	15					30	0	0	1	1	2	3	1	2	1	1	1	1	1	1	1	0	0	0	1	1	0	0	0	0	0	0	0	0	0	0	1	0	0	0	0	3	2	2	1	2	2
175	90	2	40					30	1	1	1	0	3	1	1	2	0	1	0	0	1	0	0	0	0	1	1	1	1	0	0	0	0	0	0	0	0	0	0	0	0	0	0	3	1	2	2	2	2
177	88	2	40					60	1	1	1	1	2	1	1	3	1	0	3	0	0	1	1	0	0	0	1	1	1	0	0	0	0	0	0	0	0	0	0	0	0	0	0	3	1	1	2	2	2
185	88	2	40					60	1	1	1	0	4	1	1	2	1	1	0	0	0	0	0	0	0	0	0	1	0	0	0	0	0	0	0	0	0	0	0	1	0	0	0	2	1	2	2	2	2
175	82	2	40					120	1	1	1	1	2	1	1	2	1	1	0	0	1	1	0	0	0	1	1	1	0	0	0	0	0	0	0	0	0	1	0	1	0	0	0	3	2	2	2	2	2
157	60	2	40					15	0	0	1	0	3	2	1	2	1	1	1	0	0	0	0	0	0	0	0	1	0	0	0	0	0	0	0	0	0	1	0	1	0	0	0	2	1	2	2	2	2
177	86	2	40					90	1	1	1	1	2	1	1	2	1	1	1	0	1	1	1	1	1	0	1	1	0	0	0	0	0	0	0	0	0	0	1	0	0	1	0	3	1	2	2	1	2
174	65	2	40					60	1	1	1	0	3	1	1	2	0	1	1	0	1	0	1	0	0	0	0	0	0	0	0	0	0	0	0	0	0	0	0	0	0	0	0	1	2	2	2	2	2
163	61	2	40					45	1	1	1	0	2	1	1	2	1	1	0	0	1	0	1	0	0	1	1	0	0	0	0	0	0	0	0	0	0	0	0	0	0	0	0	1	2	2	2	2	2
170	71	2	40					45	1	1	1	0	4	1	1	2	1	1	0	1	0	0	0	0	0	0	0	0	0	0	0	0	0	0	0	0	0	0	0	0	0	0	0	0	2	2	2	2	2
190	100	2	40					60	1	1	1	1	2	1	1	2	1	1	0	1	1	0	1	0	0	0	1	1	0	0	0	1	0	0	1	1	0	0	0	0	0	0	0	3	2	1	2	2	2
167	67.4	3	52	3	1	1	1	90	0	1	1	1	2	1	1	3	1	1	0	0	1	1	0	1	0	1	1	1	0	0	0	0	0	0	1	0	0	0	0	1	0	0	0	3	1	2	2	2	2
187	78	2	41					180	0	1	0	0	2	1	1	2	1	1	2	0	1	1	1	0	1	0	1	1	0	0	0	0	0	0	0	0	0	0	1	0	0	0	0	3	2	2	2	2	1
164	70	2	41					60	1	1	1	0	2	3	1	2	1	1	0	1	1	0	1	0	0	0	1	1	0	0	0	0	0	1	0	0	1	1	0	0	1	0	0	3	2	1	1	2	2
172	93	3	25	2	1	1	1	180	0	1	1	0	3	1	1	2	1	1	6	1	1	0	1	0	0	0	1	1	0	0	0	0	0	0	0	0	0	0	0	1	0	0	0	3	2	2	2	1	2
176	86	2	15	2	1	2	1	30	1	1	1	1	2	3	1	2	1	0	4	1	1	0	1	0	0	0	1	1	1	0	0	0	0	0	0	0	0	0	0	0	0	0	0	3	1	2	2	2	2
165	60	2	41					90	1	1	0	0	3	1	0	2	0	1	0	0	0	0	0	0	0	0	0	1	0	0	0	0	0	0	0	0	0	0	0	1	0	0	0	2	1	2	2	2	2
153	55	2	41					60	1	1	1	0	3	1	1	2	1	1	0	1	1	0	1	1	0	0	1	1	0	0	0	0	0	0	0	0	1	1	0	1	0	0	0	3	1	2	2	2	2
185	118	2	41					90	0	0	1	0	2	1	1	2	0	1	0	1	0	0	0	0	0	0	0	0	0	0	0	0	0	0	0	0	0	0	0	0	0	0	0	0	2	2	2	2	2
165	52	1	41					30	0	1	1	0	2	1	1	2	1	1	0	1	1	0	1	0	0	0	1	1	0	0	0	0	0	1	0	0	0	1	0	1	0	0	0	3	1	1	2	2	2
172	90	2	41					60	1	1	0	0	3	1	1	2	0	1	0	0	1	1	0	0	0	0	1	1	0	0	0	0	0	0	0	0	0	1	0	1	0	0	0	3	1	2	2	2	2
172.5	95	2	55					30	0	1	1	0	2	1	1	2	0	1	0	0	1	0	0	0	0	1	1	1	0	0	0	0	0	0	0	0	1	0	0	1	0	0	0	3	1	1	2	2	2
157	55	2	45	2	1	1	1	120	1	1	0	0	2	1	1	3	1	1	0	0	1	1	0	0	0	1	1	1	0	0	0	0	0	0	0	0	1	0	1	0	0	0	0	3	1	1	2	2	2
181	96	2	48	2	1	1	1	180	1	1	1	0	2	1	1	2	1	1	1	0	0	0	0	0	0	0	0	1	1	0	0	0	0	0	0	0	0	0	0	0	0	0	0	2	1	2	2	2	2
172	110	3	50					120	0	0	1	1	2	1	1	2	1	1	1	1	1	0	1	0	0	1	1	1	1	0	0	0	0	0	0	0	0	0	0	0	0	0	0	3	2	1	2	2	2
176	84	2	0					15	0	1	1	0	4	3	1	2	1	1	2	1	1	1	1	1	0	0	1	1	0	0	0	0	0	0	0	1	0	0	0	1	0	0	0	3	1	1	2	2	2
169	65	2	42					60	0	0	0	0	4	2	1	2	0	1	0	0	1	0	0	1	0	1	0	0	0	0	0	0	0	0	0	0	0	0	0	0	0	0	0	1	2	2	2	2	2
173	112	3	42					60	1	1	0	0	8	2	1	2	1	1	2	1	0	0	0	0	0	0	0	1	1	0	0	0	0	0	0	0	0	0	0	0	0	0	0	2	1	1	2	2	2
180	85	2	42					240	1	1	0	0	3	1	1	2	0	1	6	0	1	0	1	1	0	0	1	1	0	0	0	0	0	0	1	0	0	0	0	1	0	0	0	3	1	1	2	2	2
160	47	2	10	2	1	3	1	60	1	1	1	0	4	1	1	2	1	1	0	1	0	0	0	0	0	0	0	1	0	0	0	0	0	0	0	0	0	0	0	1	0	0	0	2	1	2	2	2	2
167	67.4	3	53	3	1	1	1	90	0	1	1	1	2	1	1	2	1	1	0	0	1	1	0	1	0	1	1	1	0	0	0	0	0	0	0	0	0	0	1	0	0	0	0	3	2	2	2	2	2
155	70	2	42					30	0	1	1	0	3	1	1	2	1	1	2	1	0	0	0	0	0	0	0	1	0	0	0	0	0	0	0	0	0	1	0	0	0	0	0	2	2	1	2	2	2
168	78	3	42					60	1	1	0	0	3	1	1	2	0	1	0	0	1	0	1	0	0	0	1	1	0	0	0	0	0	0	0	0	1	1	0	0	0	0	0	3	1	2	2	2	2
165	67.5	2	5					40	1	0	1	0	3	1	1	2	0	0	0	1	0	0	0	0	0	0	0	0	0	0	0	0	0	0	0	0	0	0	0	0	0	0	0	0	2	2	2	2	2
160	55	2	43					30	1	1	1	1	8	1	1	3	0	0	0	1	0	0	0	0	0	0	0	0	0	0	0	0	0	0	0	0	0	0	0	0	0	0	0	0	2	2	2	2	2
167.5	85	3	43					45	1	1	0	0	4	2	1	2	0	0	1	0	1	0	1	1	0	0	1	1	1	0	0	0	0	0	0	0	0	0	0	0	0	0	0	3	1	2	2	2	2
160	60	2	43					45	1	0	0	0	3	2	1	2	1	1	0	1	1	0	1	0	0	0	1	1	1	0	0	0	0	0	0	0	0	0	0	0	0	0	0	3	1	2	2	2	2
178	70	2	43					60	1	1	1	0	3	3	1	2	0	1	3	1	1	1	0	0	0	0	1	1	0	0	0	1	0	0	0	0	0	0	1	0	0	0	0	3	2	1	2	2	2
178	103	2	30	3	1	1	2	180	1	1	1	0	2	1	1	2	1	1	0	0	1	0	1	1	0	1	1	1	0	0	0	0	0	0	0	0	1	1	0	0	0	1	0	3	1	1	2	2	2
165	80	3	45	2	1	1	1	120	0	0	0	1	0		1	2	0	1	0	0	0	0	0	0	0	0	0	1	0	0	0	0	0	0	0	1	0	0	0	0	0	0	0	2	2	1	2	2	2
170	69	3	40	2	2	1	1	40	0	1	0	0	3	1	1	2	0	1	0	0	1	0	1	0	0	0	1	1	1	1	0	0	0	0	0	0	0	0	0	0	0	0	0	3	1	2	2	2	2
167	80	2	43					120	1	1	1	0	2	1	1	2	1	1	0	1	1	0	1	1	0	0	1	1	0	0	0	0	0	0	0	0	0	0	1	1	0	0	0	3	2	1	2	2	2
163	62.5	3	43					60	1	1	0	0	4	1	1	2	1	1	0	0	0	0	0	0	0	0	0	1	0	0	0	0	0	0	0	0	0	0	0	1	0	0	0	2	1	2	2	2	2
178	86	1	50	3	2	1	1	90	1	1	0	1	4	1	1	2	0	1	0	1	1	0	0	0	0	0	1	1	0	0	0	0	0	0	0	0	0	1	0	0	0	0	0	2	1	2	2	2	2
153	53	2	44					260	1	1	1	0	3	1	1	2	1	1	0	0	1	0	1	0	0	0	0	0	0	0	0	0	0	0	0	0	0	0	0	0	0	0	0	1	2	2	2	2	2
163	86	2	0					12	0	0	1	1	3	1	1	2	1	1	2	1	1	0	0	1	0	0	1	1	0	0	0	0	0	0	0	0	0	0	0	1	0	0	0	1	1	2	2	2	2
176	91	3	40	2	1	3	1	90	1	1	1	0	3	1	1	3	0	0	1	1	0	0	0	0	0	0	0	0	0	0	0	0	0	0	0	0	0	0	0	0	0	0	0	0	2	2	2	2	2
160	72	2	44					30	1	1	1	1	4	1	1	2	0	1	4	1	0	0	0	0	0	0	0	0	0	0	0	0	0	0	0	0	0	0	0	0	0	0	0	0	2	2	2	2	2
178	97	2	50	3	1	3	1	70	0	1	1	1	2	1	0	3	1	1	4	1	0	0	0	0	0	0	0	1	0	0	0	0	0	0	0	0	0	0	1	0	0	0	0	2	1	2	2	2	2
160	87	2	45	3	1	3	2	60	0	1	1	0	2	3	1	2	1	1	1	1	1	0	1	1	0	1	1	1	1	1	0	0	0	0	0	0	0	1	1	0	0	1	0	3	1	1	1	2	2
163	69	3	44					30	1	1	0	0	4	2	1	2	0	1	0	0	1	0	1	0	0	0	1	1	0	0	0	0	0	0	0	0	0	1	0	1	0	0	0	3	1	2	2	2	2
182	100	2	44					60	1	1	0	0	8	3	1	3	0	1	0	0	0	0	0	0	0	0	0	1	1	0	0	0	0	0	0	0	1	0	0	0	0	0	0	2	1	2	2	1	2
182	85	2	45	2	1	3	1	60	1	1	1	0	2	1	1	3	1	1	0	0	1	0	1	1	0	1	1	1	1	1	0	0	0	0	0	1	0	0	0	0	0	0	0	3	1	2	2	2	1
180	93	2	45					30	1	1	1	0	2	2	0	2	0	1	1	0	1	0	1	0	0	0	1	1	0	1	0	0	0	0	0	0	0	0	0	0	0	0	0	1	2	1	2	2	2
173	81.43	2	50	3	2	1	1	120	1	1	1	1	2	1	1	3	1	1	0	1	1	1	1	1	0	0	1	1	1	0	0	0	0	0	0	0	0	0	0	0	0	0	0	3	1	2	2	2	2
183	72	1	45					60	0	1	1	1	8	2	0	2	0	1	3	1	1	0	0	1	0	0	1	1	1	0	0	0	0	0	0	0	0	0	0	1	0	0	0	3	1	2	2	2	2
160	85	3	45					30	0	1	0	1	8	2	1	3	1	1	1	1	0	0	0	0	0	0	0	1	0	0	0	0	0	0	1	0	0	0	1	0	0	0	0	2	2	2	2	2	1
165	89	2	45					45	1	1	1	1	6	1	1	3	0	0	0	1	0	0	0	0	0	0	0	1	1	0	0	0	0	0	0	0	0	0	0	0	0	0	0	2	1	2	2	2	2
165	72	2	30					60	1	1	0	0	2	2	1	2	0	0	3	1	0	0	0	0	0	0	0	1	0	0	0	0	0	0	0	0	0	1	0	0	0	1	0	2	1	2	1	2	2
172	62	2	20	2	1	3	1	70	0	1	0	0	5	2	0	2	1	1	0	0	0	0	0	0	0	0	1	1	0	0	0	0	0	0	0	0	0	0	0	0	0	1	0	2	2	2	2	2	2
167	79	2	45					90	0	0	1	1	3	1	1	2	1	1	1	1	0	0	0	0	0	0	0	0	0	0	0	0	0	0	0	0	0	0	0	0	0	0	0	0	2	2	2	2	2
157.5	63	2	45					70	1	1	0	1	5	1	1	2	0	1	0	0	0	0	0	0	0	0	0	0	0	0	0	0	0	0	0	0	0	0	0	0	0	0	0	0	2	2	2	2	2
180	80	1	45					0	1	1	1	1	2	1	0	2	0	1	0	1	1	0	1	1	0	0	1	1	0	0	0	0	0	0	0	1	1	0	0	0	0	0	0	3	2	2	1	1	2
170	70	2	46					0	1	1	1	1	2	1	1	3	0	1	0	1	1	1	1	0	1	0	1	1	1	0	0	0	0	0	0	0	0	0	0	0	1	1	0	3	1	2	1	1	2
167	72	2	46					30	1	0	1	1	3	1	1	2	1	1	2	1	1	0	1	0	0	0	1	1	0	0	0	1	0	0	0	0	0	0	0	0	0	0	0	3	2	2	1	1	2
178	83	2	46					360	1	1	0	1	1		1	2	0	1	0	1	1	0	1	1	0	0	1	1	0	0	0	0	1	0	0	0	0	0	0	1	0	0	0	3	1	2	2	2	2
167	53	2	46					60	1	0	0	0	4	2	1	3	0	1	0	0	0	0	0	0	0	0	0	0	0	0	0	0	0	0	0	0	0	0	0	0	0	0	0	0	2	2	2	2	2
162.5	68	3	46					120	1	1	0	0	3	1	1	2	1	1	1	1	1	0	1	0	0	0	1	1	0	1	0	0	0	0	0	0	0	0	0	1	0	0	0	3	1	2	2	2	2
169	67	2	46					45	1	1	1	0	2	1	1	2	0	1	0	0	1	0	1	1	0	1	1	1	0	1	0	0	0	0	0	1	0	1	1	0	1	0	0	3	2	1	2	1	2
183	78	2	46					30	1	1	0	0	2	1	1	2	0	1	0	1	1	0	1	0	0	1	1	1	0	0	0	0	0	0	0	0	1	1	1	0	0	0	0	3	1	1	2	2	2
162	67	2	46					60	1	0	0	0	2	1	1	2	0	1	0	0	1	0	1	1	0	0	1	1	0	0	0	0	0	0	0	0	1	1	1	0	0	0	0	3	1	2	2	2	2
165	58	2	46					60	1	1	1	0	3	1	1	2	1	0	0	0	1	0	1	0	0	1	1	1	0	1	0	0	0	0	0	0	0	0	0	0	0	0	0	3	1	2	2	2	2
192	84	2	52	3	1	1	1	90	0	1	1	0	3	2	1	2	0	0	3	0	0	0	0	0	0	0	0	1	1	0	0	0	0	0	0	0	0	0	0	0	0	0	0	2	1	2	2	2	2
160	60	2	46					60	0	0	0	0	5	2	1	2	0	0	0	1	1	0	1	0	0	0	1	1	1	0	0	0	0	0	0	0	0	0	0	0	0	0	0	3	1	2	2	2	2
158	61	2	46					30	1	1	0	1	2	2	1	2	0	1	0	1	0	0	0	0	0	0	0	1	0	0	0	0	0	0	0	0	0	0	0	1	0	0	0	2	1	2	2	2	2
180	92	2	50	2	1	1	1	40	0	1	0	0	2	1	1	2	1	1	6	0	1	0	1	0	0	0	1	1	0	0	0	0	0	0	0	0	0	1	0	0	0	0	0	3	1	2	2	2	2
170	118	3	47					15	0	1	1	0	4	1	1	2	0	0	3	0	1	0	0	0	0	0	0	0	0	0	0	0	0	0	0	0	0	0	0	0	0	0	0	0	2	2	2	2	2
175	75	2	47					0	1	1	0	1	2	1	1	2	0	1	3	1	0	0	0	0	0	0	0	1	1	0	0	0	0	0	0	0	0	0	0	0	0	0	0	2	1	2	2	2	2
166	93	2	65					60	0	1	0	0	8	1	1	2	1	1	1	0	1	0	0	0	0	1	1	0	0	0	0	0	0	0	0	0	0	1	0	0	0	0	0	3	2	1	2	2	2
173	82	2	10	2	1	1	1	60	0	1	0	1	4	2	1	2	0	1	1	1	1	0	1	0	0	0	1	1	0	0	0	0	0	0	0	1	0	0	0	0	0	0	0	3	2	2	2	2	1
161	55	2	47					90	1	1	1	0	3	3	1	2	1	1	0	0	1	0	1	0	0	0	1	1	0	1	0	1	0	0	0	0	0	0	0	0	0	0	0	3	1	1	2	2	2
186	80	2	47					60	1	1	0	1	3	1	1	2	0	1	0	0	1	0	1	0	0	0	1	1	0	0	0	0	0	0	0	0	0	0	1	0	0	0	0	3	2	2	2	2	2
178	76	2	45					20	1	1	1	1	2	3	1	2	1	1	0	0	1	0	1	1	0	1	1	1	1	1	0	0	0	0	0	0	1	0	0	1	0	1	0	3	1	1	2	2	2
170	60	2	60					60	0	1	1	0	2	1	1	2	1	1	1	0	1	0	1	0	0	1	1	1	0	0	0	0	1	0	0	0	0	0	0	0	0	0	0	3	2	1	2	2	2
175	75	2	48					60	1	0	1	0	2	1	1	2	1	1	1	1	0	0	0	0	0	0	0	1	0	0	0	0	0	1	0	1	0	0	0	1	0	0	0	2	1	1	2	2	2
168	68	2	48					30	1	1	1	1	2	3	1	2	0	1	1	1	1	0	1	0	0	0	1	1	0	0	0	0	0	0	0	0	0	0	1	0	0	1	0	3	2	1	1	2	2
164	55	2	48					60	1	1	1	0	2	1	1	3	1	1	0	1	1	0	1	0	0	0	1	1	0	0	0	0	0	0	0	0	0	0	0	1	0	0	0	3	1	2	2	2	2
154	72	2	49					30	1	1	1	0	2	1	1	2	0	1	1	0	0	0	0	0	0	0	0	1	0	0	0	0	0	0	0	0	0	0	0	1	0	0	0	3	1	2	2	2	2
171	63	2	49					30	1	0	1	0	2	1	1	2	0	0	1	0	1	0	1	1	0	0	1	1	0	0	0	0	0	0	0	0	1	1	0	0	0	1	0	3	1	2	2	1	2
150	90	3	49					60	1	1	0	1	2	1	0	2	1	1	0	1	1	1	1	0	0	0	1	1	1	0	0	0	0	0	0	0	0	0	0	1	0	0	0	3	1	2	2	2	2
194	112	2	40					30	0	1	1	1	8	2	0	2	0	0	1	1	1	0	1	1	0	0	1	1	1	1	0	1	1	0	0	1	0	1	1	1	0	1	0	3	1	1	1	1	2
180	74	3	30	3	1	1	2	120	0	1	0	0	2	1	1	2	1	0	1	0	1	1	0	0	0	0	1	1	1	0	0	0	0	0	0	0	0	0	0	0	0	0	0	3	1	2	2	2	2
172	78	2	49					90	1	1	1	1	2	2	1	2	1	1	0	0	1	0	1	0	0	1	1	1	1	0	0	0	0	0	0	0	0	0	0	0	0	0	0	3	1	2	2	2	2
167.5	65	2	20					40	0	1	0	0	3	2	1	2	1	1	0	0	1	0	1	0	0	0	1	1	0	0	0	0	0	0	0	0	1	0	0	1	0	0	0	3	1	2	2	2	2
163	100	3	49					15	1	1	0	0	2	2	1	2	0	1	0	0	1	0	0	0	0	1	1	1	0	0	0	0	0	0	0	0	0	0	0	1	0	0	0	3	1	2	2	2	2
165	67	2	49					40	1	1	1	1	2	1	1	2	0	1	0	1	1	0	0	1	0	0	1	1	1	0	0	0	0	1	0	0	0	0	0	1	0	0	0	3	1	1	2	2	2
157	48	2	25					20	0	1	0	0	2	1	1	3	0	1	0	1	1	1	1	0	1	1	1	1	0	0	0	0	0	0	0	0	0	0	0	1	0	0	0	3	1	2	2	2	2
170	74	3	50					30	1	1	1	0	2	1	1	3	0	1	0	1	1	0	0	0	0	1	0	0	0	0	0	0	0	0	0	0	0	0	0	0	0	0	0	1	2	2	2	2	2
165	101	3	50					30	1	1	0	1	8	2	1	2	0	1	2	0	0	0	0	0	0	0	0	1	0	0	0	0	1	0	0	0	0	0	0	0	1	0	0	2	2	2	2	2	1
153	72	1	50					30	0	1	0	1	8	1	1	2	1	1	0	1	1	0	0	0	0	0	1	1	0	0	0	0	0	0	0	0	0	1	1	0	1	0	0	3	1	1	2	1	2
165	92	3	55	3	1	1	1	120	1	1	0	0	3	1	1	2	0	1	0	1	1	0	1	0	0	0	1	1	1	0	0	0	0	0	0	0	0	1	0	1	0	0	0	3	1	2	2	2	2
190	99	2	50					45	1	0	0	0	3	1	1	2	1	1	0	0	1	0	1	1	0	0	1	1	0	0	0	0	0	0	0	0	0	0	1	0	0	0	0	3	2	1	2	2	2
173	100	2	50	4	1	3	2	0	1	1	0	0	2	1	1	2	0	1	0	1	1	0	1	0	0	0	1	1	0	0	0	0	0	0	0	0	0	0	0	0	1	1	0	3	2	1	2	2	2
182	98.6	2	50					60	1	1	0	0	5	1	1	2	0	0	2	1	0	0	0	0	0	0	0	1	0	0	0	0	0	1	0	0	0	0	0	0	0	0	0	2	1	2	2	2	2
165	65	3	60					30	0	0	1	0	2	1	1	3	0	1	0	0	0	0	0	0	0	0	0	0	0	0	0	0	0	0	0	0	0	0	0	0	0	0	0	0	2	2	2	2	2
184	103	2	51					60	1	1	1	1	3	1	1	2	0	1	3	0	0	0	0	0	0	0	0	1	1	1	0	0	0	0	0	0	0	0	0	1	0	0	0	2	1	1	2	2	2
192	109	3	50					90	1	0	0	0	2	1	1	2	0	1	0	0	1	1	1	0	0	0	1	1	1	0	0	0	0	0	0	0	0	0	0	0	1	0	0	3	1	1	2	2	2
170	73	3	51					30	1	1	0	0	2	1	1	3	0	1	0	0	1	0	0	0	0	1	0	0	0	0	0	0	0	0	0	0	0	0	0	0	0	0	0	1	2	2	2	2	2
172	77	2	51					60	0	1	0	0	5	1	1	2	0	1	2	0	0	0	0	0	0	0	0	1	0	0	0	0	0	0	0	1	0	0	0	0	0	0	0	2	2	2	2	2	2
189	80	2	40	2	1	1	1	30	1	1	1	1	2	1	1	2	1	1	0	1	1	0	1	1	0	0	1	1	0	0	0	0	0	0	0	0	1	1	0	1	0	0	0	3	1	1	2	2	2
183	96	2	51					30	1	1	0	1	4	2	1	2	0	1	1	1	0	0	0	0	0	0	0	1	0	0	0	0	1	0	0	0	0	0	0	0	0	0	0	2	2	2	2	1	2
172	82	3	60	3	2	3	1	60	1	1	0	0	2	1	1	2	0	1	0	1	0	0	0	0	0	0	1	1	0	0	0	0	0	0	1	0	0	0	0	1	0	0	0	3	1	2	2	2	1
183	80	3	69					120	0	1	1	0	3	1	1	3	0	1	0	0	0	0	0	0	0	0	1	1	0	1	0	0	0	0	0	0	0	0	0	0	0	0	0	2	2	2	2	1	2
150	62	2	65					60	0	1	1	0	2	2	1	2	1	1	0	1	1	0	1	0	1	1	1	1	0	0	0	0	0	0	0	0	0	1	0	1	0	0	0	3	1	2	2	2	2
162	52	2	52					60	0	1	0	0	2	1	1	2	0	1	0	1	1	0	1	1	1	0	1	1	0	0	0	0	0	1	0	0	1	0	0	0	0	0	0	3	1	2	1	2	2
187	95	3	56	3	1	1	1	90	1	1	1	0	2	2	1	2	1	1	2	1	1	1	1	1	0	0	1	1	1	0	0	0	0	0	0	0	0	0	0	1	0	0	0	3	1	2	2	2	2
160	58	2	52					30	0	1	0	0	3	1	1	2	1	1	0	1	1	1	0	0	0	0	0	0	0	0	0	0	0	0	0	0	0	0	0	0	0	0	0	1	2	2	2	2	2
160	69.5	2	52					60	1	0	1	0	2	2	1	2	1	1	0	1	1	0	1	1	0	0	1	1	0	0	0	0	0	0	0	0	0	0	0	1	0	0	0	3	1	2	1	2	2
190	110	3	53					240	1	1	1	0	2	1	1	2	0	0	0	1	1	1	1	1	0	1	1	1	0	0	0	0	0	0	0	0	0	0	1	0	0	0	0	3	2	2	2	2	1
168	91	3	53					75	1	1	1	0	4	2	1	2	0	1	2	1	1	0	0	0	0	1	1	1	0	1	0	0	0	0	0	0	0	0	0	1	0	0	0	3	1	2	2	1	2
155	46	3	53					45	0	1	0	0	4	2	0	2	1	1	0	1	0	0	0	0	0	0	0	1	0	0	0	0	0	0	0	0	0	1	0	0	0	0	0	2	2	2	1	2	2
156	100	2	53					60	1	1	0	0	2	1	1	2	1	1	0	0	1	0	1	1	0	1	1	1	0	0	0	0	1	0	0	0	0	0	0	1	0	0	0	3	1	2	2	2	2
171	79	2	53					60	1	1	0	0	3	1	1	2	0	1	0	0	1	0	1	1	0	0	1	1	0	0	0	0	1	1	0	0	0	0	0	0	0	0	0	3	2	1	1	2	2
176	83	2	67					30	0	0	0	0	2	1	1	3	0	1	0	0	1	1	1	1	0	1	1	1	0	0	0	0	0	0	0	0	0	1	0	0	1	0	0	3	1	2	2	2	2
182	85	2	65					6	0	0	0	1	4	4	1	2	1	1	3	1	1	0	1	1	0	0	1	1	1	1	0	1	1	0	0	0	0	0	0	1	0	1	0	3	1	1	2	1	2
155	68	2	54					30	0	1	1	0	3	2	0	2	0	1	0	1	0	0	0	0	0	0	0	1	0	0	0	1	0	0	0	0	0	0	0	0	0	0	0	2	2	1	2	2	2
190	110	3	54					240	1	1	1	0	2	1	1	2	0	0	0	1	1	0	1	1	0	1	1	1	0	0	0	0	0	0	0	1	0	1	0	1	0	1	0	3	1	1	1	2	2
176	89.5	2	54					360	1	1	1	1	5	1	0	2	1	1	0	1	0	0	0	0	0	0	0	1	0	0	0	0	0	0	0	0	0	0	0	1	0	0	0	2	2	2	1	2	2
168	80	2	54					60	0	1	0	1	8	1	2	2	0	1	2	0	0	0	0	0	0	0	0	1	0	0	0	0	0	0	0	0	0	0	0	0	1	0	0	2	2	2	2	2	2
169	104	2	55					45	1	1	1	0	2	1	1	2	0	1	0	1	1	1	1	1	1	0	1	1	1	0	0	0	0	0	0	0	0	1	0	0	0	0	0	3	1	2	2	2	2
180	109	2	55					90	1	1	1	1	2	1	1	2	1	1	0	1	1	0	1	0	0	0	1	1	1	0	0	0	0	0	0	0	0	1	0	0	0	1	0	3	1	2	1	1	2
181	72	2	70					90	0	0	1	0	5	2	1	2	0	1	0	0	0	0	0	0	0	0	0	0	0	0	0	0	0	0	0	0	0	0	0	0	0	0	0	0	2	2	2	2	2
165	58	2	65					40	1	0	0	0	2	1	1	2	0	1	0	0	1	1	1	0	0	0	1	1	0	0	0	0	0	0	0	0	0	1	0	1	0	0	0	3	1	2	2	2	2
155	60	2	55					90	1	1	0	0	2	1	1	2	1	1	0	1	1	0	0	1	0	0	0	0	0	0	0	0	0	0	0	0	0	0	0	0	0	0	0	1	2	2	2	2	2
160	54	2	56					45	1	0	1	0	3	1	1	2	1	1	0	0	0	0	0	0	0	0	0	0	0	0	0	0	0	0	0	0	0	0	0	0	0	0	0	0	2	2	2	2	2
173	104	2	56					40	0	0	1	0	4	2	1	2	1	1	0	0	1	0	1	1	0	0	1	1	0	0	0	0	0	0	0	0	0	0	0	1	0	0	0	3	1	2	2	2	2
179	78	3	56					180	1	1	1	0	2	1	1	2	0	1	0	0	1	0	1	0	0	0	0	0	0	0	0	0	0	0	0	0	0	0	0	0	0	0	0	1	2	2	2	2	2
178	72	2	50	2	1	2	1	120	0	1	0	1	3	2	1	2	0	1	0	1	1	0	0	1	0	0	1	1	0	0	0	0	0	0	0	0	0	0	0	1	0	0	0	3	1	2	2	2	2
172	85	2	56					120	1	1	0	1	2	1	1	2	0	0	0	1	1	0	1	0	0	0	1	1	0	0	0	0	0	1	0	1	1	1	1	0	1	1	0	3	1	1	1	1	2
162.5	88	2	56					120	1	1	0	0	2	1	1	2	0	0	0	0	1	1	1	0	1	0	1	1	0	0	0	0	0	0	0	0	0	1	0	0	0	0	0	3	1	2	2	2	2
155	80	3	57					35	0	1	1	1	2	2	1	2	0	1	0	1	0	0	0	0	0	0	0	1	1	0	0	0	0	0	0	0	0	0	0	0	0	0	0	2	1	2	2	2	2
170	71	2	57					60	1	1	1	0	2	1	1	2	0	1	0	1	0	0	0	0	0	0	0	1	0	0	0	0	0	0	0	0	0	1	0	0	0	1	0	2	1	2	1	2	2
175	83	3	57					45	1	1	1	1	2	2	1	2	1	1	0	1	1	0	1	1	0	1	1	1	0	0	0	0	0	0	0	0	0	0	1	1	0	1	0	3	1	1	2	1	2
177	92	3	57					60	1	1	0	0	3	2	1	2	0	1	0	1	1	0	1	0	0	0	1	1	0	0	0	0	1	1	0	0	0	1	1	0	0	0	0	3	1	1	1	2	2
173	78	3	50					15	0	1	0	0	2	1	1	2	0	1	1	1	1	1	1	1	0	0	1	1	1	0	0	0	0	0	0	0	0	1	0	0	0	0	0	3	1	1	2	2	2
170	83	3	58					120	1	1	1	0	2	1	1	2	0	1	0	0	0	0	0	0	0	0	0	0	0	0	0	0	0	0	0	0	0	0	0	0	0	0	0	0	2	2	2	2	2
160	47	2	58					30	1	1	0	0	3	1	1	2	0	1	0	0	1	0	1	0	0	0	0	0	0	0	0	0	0	0	0	0	0	0	0	0	0	0	0	1	2	2	2	2	2
170	70	2	70					60	0	1	1	0	3	2	1	2	0	0	0	0	0	0	0	0	0	0	0	1	0	0	0	0	1	0	0	0	0	0	0	1	0	0	0	0	1	2	2	2	2
175	65	3	59					240	1	1	1	1	2	1	1	2	1	1	0	1	1	1	1	1	0	0	1	1	1	0	0	0	0	0	0	0	0	1	0	0	0	1	0	3	1	2	1	1	2
163	63	2	25					60	1	0	0	0	2	1	1	3	0	1	0	0	1	1	1	0	0	0	1	1	0	0	0	0	0	0	0	0	0	0	1	0	1	0	0	3	2	1	2	1	2
183	84	3	55					50	0	0	1	0	2	1	1	2	0	1	3	1	1	1	1	0	1	0	1	1	0	0	0	0	0	0	0	0	1	1	1	0	0	0	0	3	1	1	2	1	2
162	63	3	60					90	1	1	1	0	3	1	1	2	0	1	0	0	1	0	1	0	0	0	1	1	0	1	0	0	0	0	0	0	0	0	0	1	0	0	0	3	1	2	2	1	2
178	78	3	61					60	1	1	0	1	8	1	1	2	0	0	0	1	0	0	0	0	0	0	0	1	0	0	0	0	0	0	0	0	1	0	0	0	1	1	0	2	2	2	2	2	1
151	87	3	61					45	1	1	0	0	3	1	0	2	1	0	0	0	0	0	0	0	0	0	0	1	0	0	0	1	0	0	0	0	0	0	0	0	0	0	0	2	1	2	2	2	2
170	78	3	61					15	1	0	0	0	2	1	1	2	0	1	0	1	1	1	1	1	1	1	1	1	0	1	0	0	0	1	0	0	0	0	1	0	0	0	0	3	2	1	2	1	2
170	80	3	62					30	1	0	0	0	4	3	1	2	0	1	0	1	0	0	0	0	0	0	0	1	0	0	0	0	0	0	0	0	0	0	0	1	0	0	0	2	1	2	2	2	2
167	54	2	63					60	1	1	0	1	2	1	1	2	1	1	0	1	1	1	1	1	1	0	1	1	0	0	0	0	0	0	0	0	0	0	0	1	1	0	0	3	1	2	1	2	2
178	92	2	70					15	1	0	0	0	2	1	0	2	0	1	0	0	1	1	1	0	1	0	1	1	0	0	0	0	0	0	0	0	0	1	0	0	0	1	0	3	1	2	2	2	2
157	42	1	64					30	0	1	0	0	2	1	1	2	0	1	0	0	1	1	1	1	1	0	1	1	1	0	0	0	0	0	0	0	0	0	0	0	0	0	0	3	1	2	2	2	2
157	53	2	64					30	0	1	0	0	2	1	1	2	0	1	0	0	1	0	1	0	0	1	1	1	0	0	0	0	0	0	0	0	0	0	0	1	0	0	0	3	1	2	2	2	2
152	52	2	64					45	1	1	0	0	7	3	1	2	1	1	0	1	1	1	0	0	0	0	1	1	0	0	0	0	1	0	0	0	0	0	0	0	0	0	0	3	2	1	2	2	2
170	80	2	65					45	1	1	1	1	2	1	1	2	1	1	0	1	1	1	1	1	0	1	1	1	0	0	0	0	0	0	0	0	0	1	0	1	0	1	0	3	1	2	2	2	2
170	69	2	65					40	1	1	0	1	2	1	1	2	0	1	0	1	1	1	1	1	0	0	1	1	0	0	0	0	1	0	0	0	0	0	0	1	0	1	0	3	1	1	1	1	2
170	73	3	66					60	1	0	0	1	4	1	0	3	0	0	0	1	1	1	1	0	0	1	1	1	1	1	0	0	0	0	0	0	0	0	0	0	0	0	0	3	2	1	2	2	2
172	96	3	5	2	1	1	1	10	0	1	1	0	2	1	1	2	1	1	0	0	1	0	0	0	0	0	1	1	1	1	0	1	0	0	0	0	0	1	1	0	1	0	0	3	1	1	1	2	2
[truncated: 1 more columns]

## Sheet: AI for queried MM
AI score	Classification	Diagnostic	Histopathology	Location
0.9	3	1	1	1
0.93	3	1	2	2
0.12	1	2	2	3
0.89	3	1	1	3
0.63	3	1	2	3
0.12	1	2	2	2
0.75	3	1	1	4
0.1	1	2	2	1
0.15	1	2	1	5
0.28	2	2	2	5
0.19	1	2	2	1
0.9	3	1	2	3
0.9	3	1	2	6
0.15	1	2	2	5
0.12	1	2	2	3
0.22	2	2	2	3
0.11	1	2	1	3
0.88	3	1	1	7
0.87	3	1	1	2
0.87	3	1	2	6
0.15	1	2	2	2
0.12	1	2	1	3
0.8	3	1	2	6
0.55	3	1	2	7
0.81	3	1	1	1
0.11	1	2	1	2
0.1	1	2	2	3
0.85	3	1	2	7
0.46	2	2	1	3
0.33	2	2	1	4
0.11	1	2	2	2
0.88	3	1	2	3
0.12	1	2	1	3
0.83	3	1	2	7
0.46	2	2	2	9
0.6	3	1	2	1
0.2	1	2	2	3
0.89	3	1	2	3
0.11	1	2	2	10
0.82	3	1	2	3
0.88	3	1	2	9
0.34	2	2	2	7
0.82	3	1	1	3
0.12	1	2	2	3
0.13	1	2	1	3
0.83	3	1	1	2
0.87	3	1	2	3
